# Supplementary material for: Knockdown H19 Accelerated iPSCs Reprogramming through Epigenetic Modifications and Mesenchymal-to-Epithelial Transition
Source: MDPI journal article supplement (doi:10.3390/biom14050509), 2024-04-23
Supplement: s1 [file s1]

Supplement Table S1. siRNA sequence of H19

| ShH19 siRNA | primer (5' to 3')   |
|-------------|---------------------|
| siRNA1      | GCTCCACTGACCTTCTAAA |
| siRNA5      | GGTTCAAGAGTGGCTCTGG |
| siRNA8      | CAGTGGACTTGGTACACTG |
| siRNA-NC    | GAAGCCAGATCCAGCTTCC |

Supplemental Table S2. RT-qPCR primer

| Gene   | Forward primer (5' to 3') | Reverse primer (5' to 3') |
|--------|---------------------------|---------------------------|
| H19    | GAACAGAAGCATTCTAGGCTGG    | TTCTAAGTGAATTACGGTGGGTG   |
| Snail1 | CACACGCTGCCTTGTGTCT       | GGTCAGCAAAAGCACGGTT       |
| Snail2 | TGGTCAAGAAACATTTCAACGCC   | GGTGAGGATCTCTGGTTTTGGTA   |
| Twist1 | GGACAAGCTGAGCAAGATTCA     | CGGAGAAGGCGTAGCTGAG       |
| Oct4   | AGAGGATCACCTTGGGGTACA     | CGAAGCGACAGATGGTGGTC      |
| Nanog  | GAACGCCTCATCAATGCCTGCA    | GAATCAGGGCTGCCTTGAAGAG    |
| Rex1   | AAGCTGCCAGCCAGTAACC       | CCTTGCGTTCCACCAACTTTC     |
| Tcf3   | GACAGAAGTGGAATTTGTGTCCG   | AGTGCCTGGTACTTTCTACGAT    |
| Gapdh  | AGGTCGGTGTGAACGGATTG      | TGTAGACCATGTAGTTGAGGTCA   |

Supplemental Table S3. RT-PCR primer

| Gene   | Forward primer (5' to 3') | Reverse primer (5' to 3') |
|--------|---------------------------|---------------------------|
| Bmp2   | TGCTTCTTAGACGGACTGCG      | CTCCACGGCTTCTTCGTGAT      |
| Nestin | GCCACTCCCTTCTCTAGTGC      | CTCGCAGAGCCTCTAACTCG      |
| Eomes  | AAATTCACCGGCACCAAAC       | AAGCCGTGTACATGGAATCGT     |
| Ttr    | TCCTGTGTCTGACGAGGAATC     | CGGGGAAATGCCAAGTGTCT      |
| Gapdh  | TGAGCCTCCTCCAATTCAACC     | CAGAAGGGGCGGAGATGATG      |
